# Supplementary material
Source: PubMed Central journal article supplement (PMC4800979)
Supplement: NIHMS758967-supplement-Material.pdf [file NIHMS758967-supplement-Material.pdf]

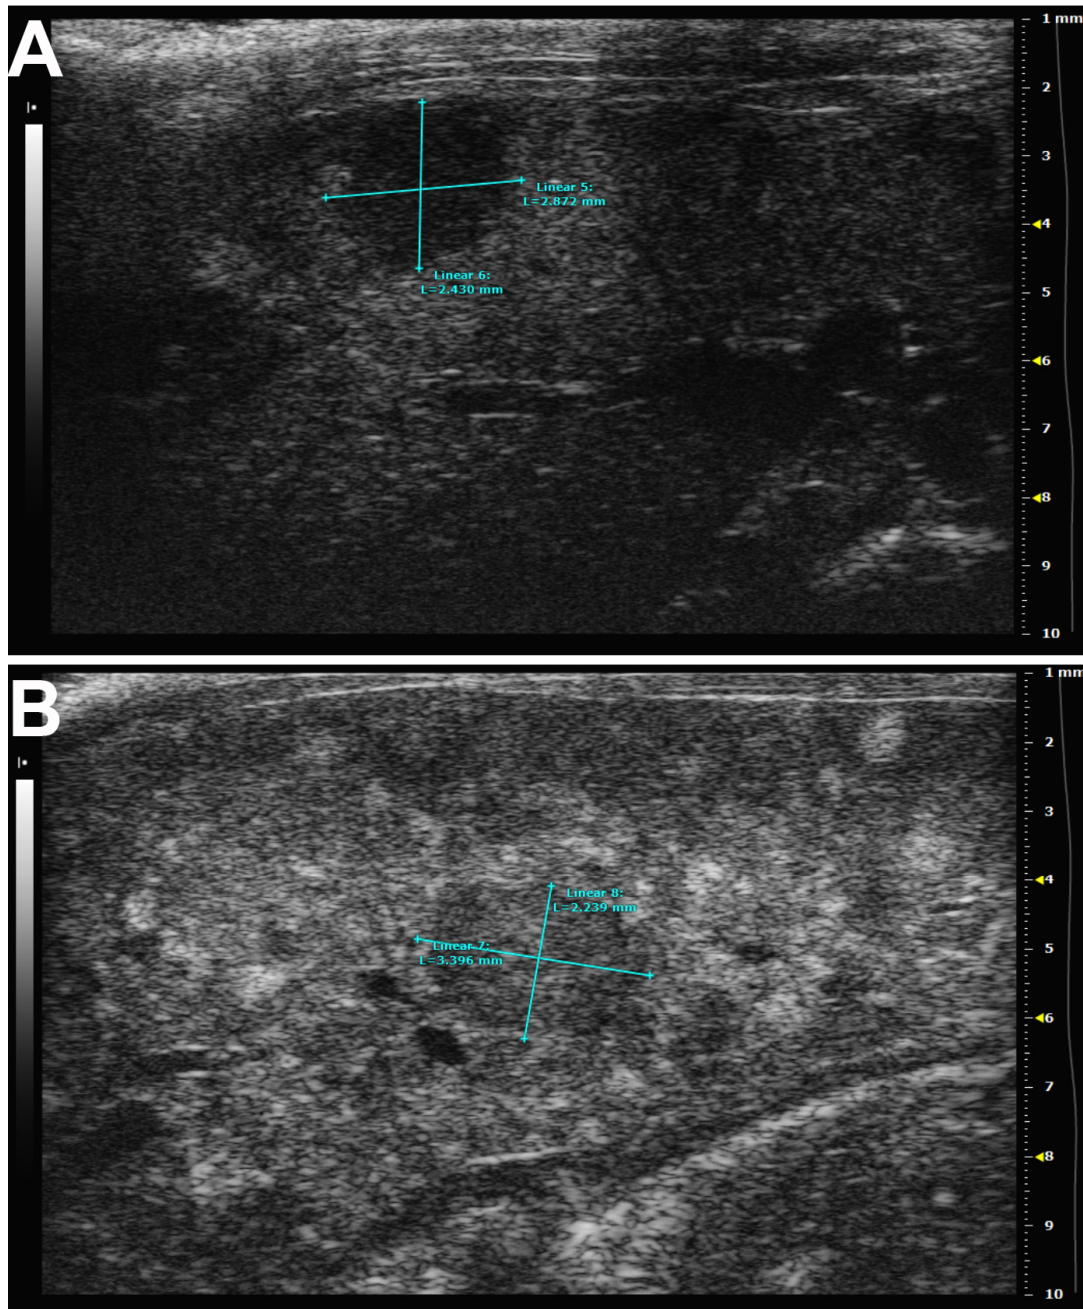

### Supplementary Figure 1

Imaging of orthotopic hepatocellular carcinoma by using abdominal high-frequency ultrasound.

(A) B-mode image of a HCA-1 Tumor 10 days after orthotopic implantation in a cirrhotic C3H mouse. Scale bar: 2mm. (B) B-mode image of a HCC tumor developed 10 weeks after Adeno-Cre injection and CCl<sub>4</sub> administration in a *Mst1<sup>-/-</sup>Mst2<sup>F/-</sup>* mouse. Scale bar: 2mm.
